# Supplementary material for: USP38 critically promotes asthmatic pathogenesis by stabilizing JunB protein
Source: PubMed Central journal article supplement — J Exp Med. 2018 Nov 5;215(11):2850–67. doi: 10.1084/jem.20172026 (PMC6219735; doi:10.1084/jem.20172026), 2018-11-05
Supplement: JEM_20172026_sm.pdf [file JEM_20172026_sm.pdf]

Supplemental material

Chen et al., <https://doi.org/10.1084/jem.20172026>

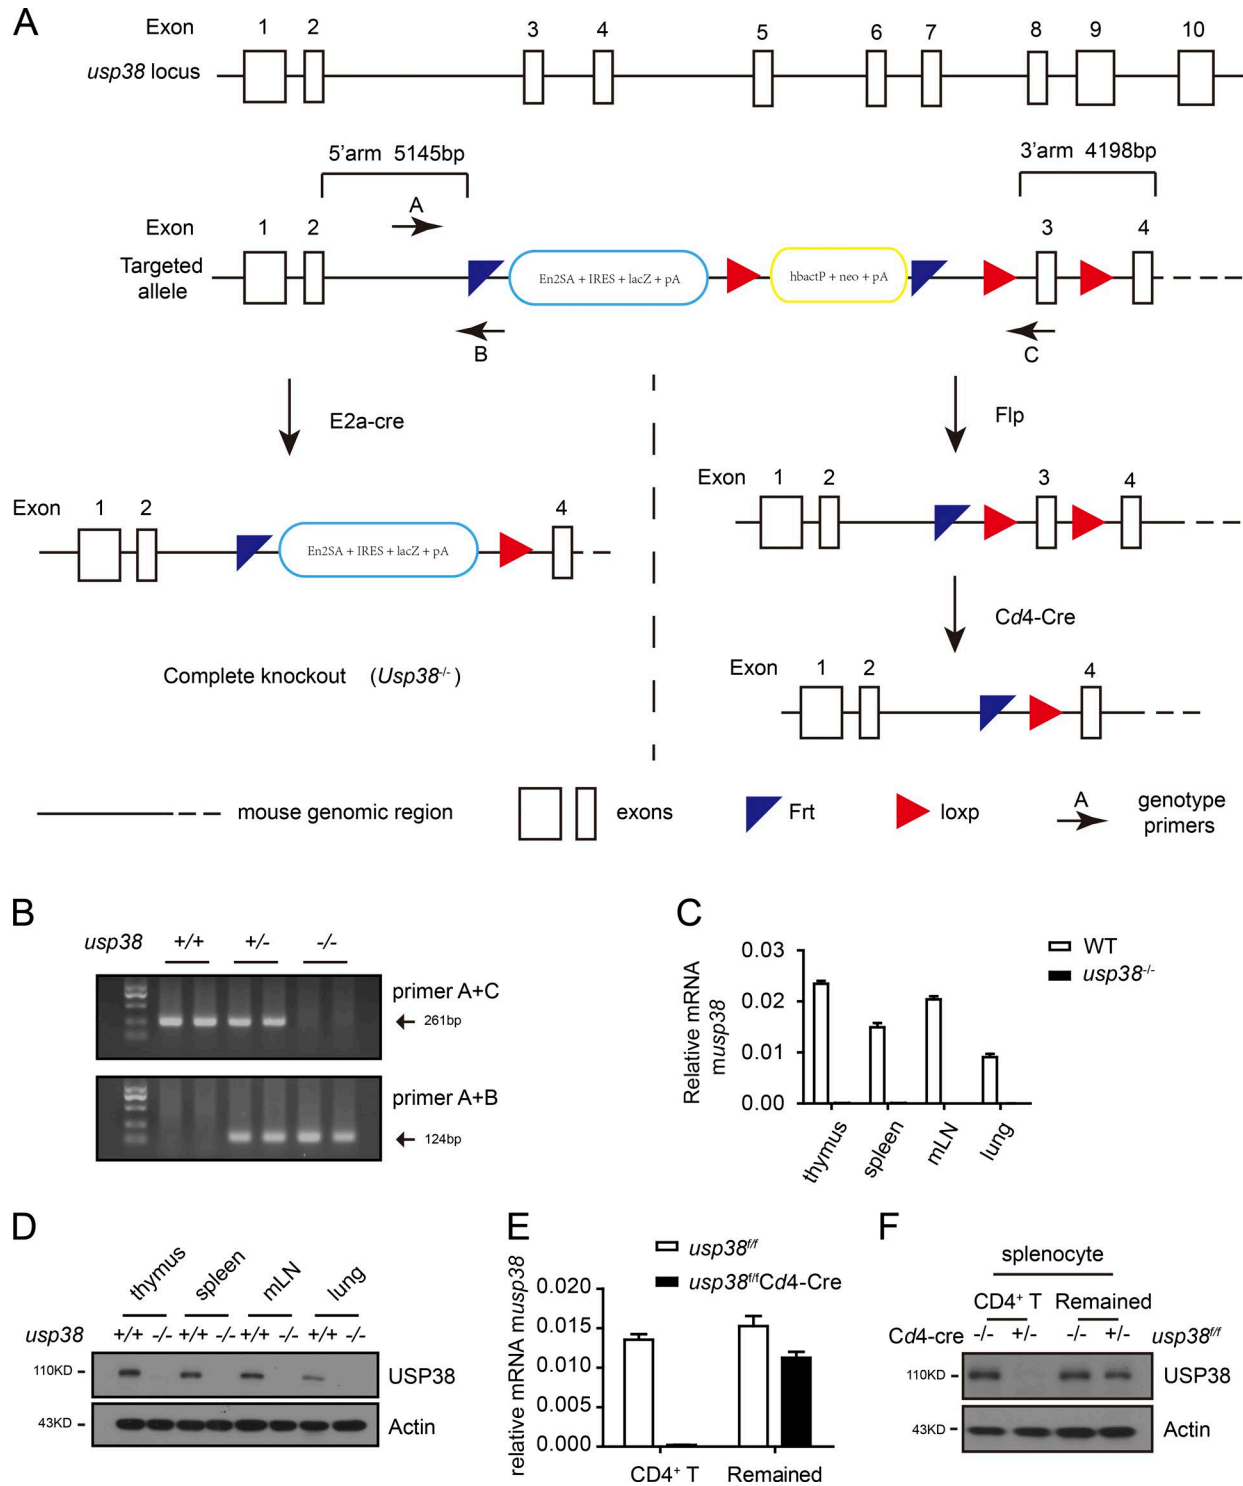

Figure S1. **Generation of *usp38* complete-deficient or T cell specific-deficient mice. (A)** Targeting strategy to generate complete or cell-type-specific deletion of *usp38* gene. **(B)** Genomic genotype of *usp38*-targeted allele by PCR. **(C and D)** The relative mRNA level (C) or the protein level (D) of *usp38* in the indicated tissues from WT and *usp38* complete knockout mice. **(E and F)** The relative mRNA level (E) or the protein level (F) of *usp38* in the isolated CD4<sup>+</sup> T cells or the remaining splenocytes after separation of CD4<sup>+</sup> T cells from *usp38*<sup>fl/fl</sup>Cd4-Cre and control mice (*usp38*<sup>fl/fl</sup>). All the data are representative of three independent experiments. Statistical significance was determined by Student's *t* test. Error bars indicate the mean  $\pm$  SEM.

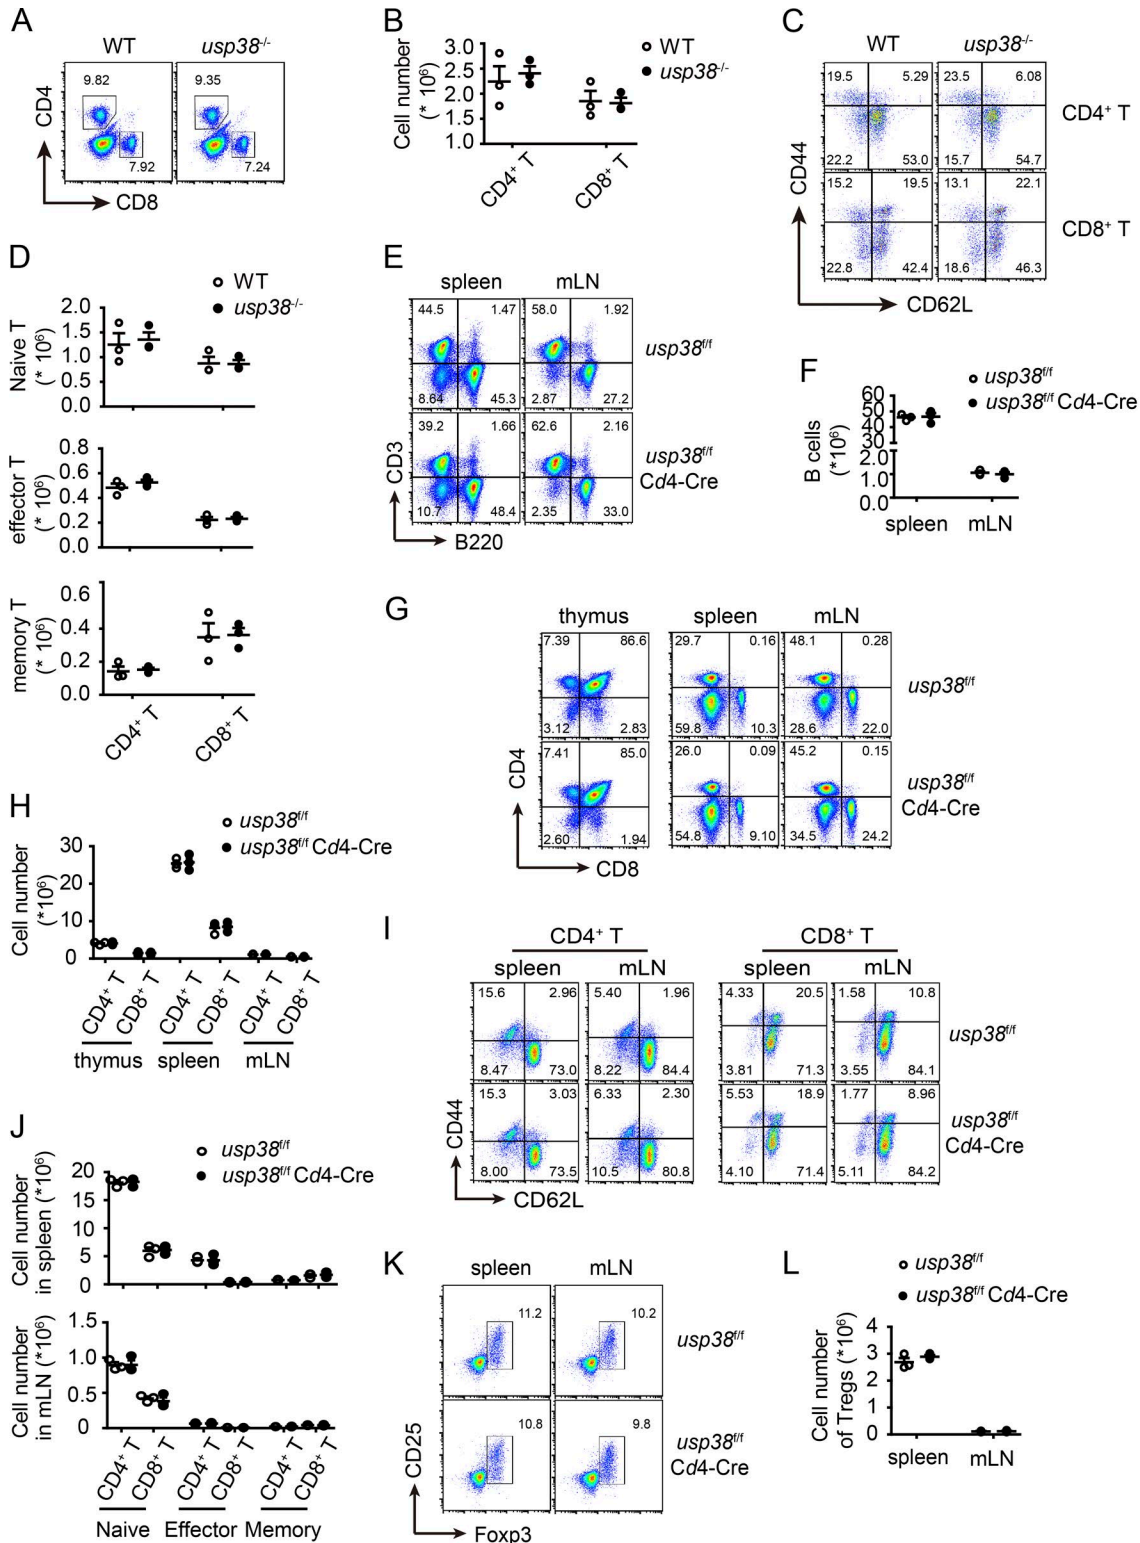

Figure S2. **USP38 deficiency neither affect homeostatic immune cells development nor alter their migration to lung.** All the experiments below were carried on 6–10-wk-old littermates. **(A and B)** Cytoflow analysis (A) and quantification (B) of CD4- or CD8-positive populations in lungs out of *usp38*<sup>-/-</sup> or WT mice. **(C and D)** Cytoflow analysis (C) and quantification (D) of naive, effector, and memory CD4<sup>+</sup> T cell populations, as well as CD8<sup>+</sup> T cells, in lungs out of *usp38*<sup>-/-</sup> or WT mice. **(E and F)** Cytoflow analysis (E) and quantification (F) of B cells in the indicated tissues out of *usp38*<sup>fl/fl</sup> Cd4-Cre or *usp38*<sup>fl/fl</sup> mice. **(G and H)** Cytoflow analysis (G) and quantification (H) of CD4- or CD8-positive populations in the indicated tissues out of *usp38*<sup>fl/fl</sup> Cd4-Cre or *usp38*<sup>fl/fl</sup> mice. **(I and J)** Cytoflow analysis (I) and quantification (J) of naive, effector, and memory CD4<sup>+</sup> T cell populations, as well as CD8<sup>+</sup> T cells, in the indicated tissues out of *usp38*<sup>fl/fl</sup> Cd4-Cre or *usp38*<sup>fl/fl</sup> mice. **(K and L)** Cytoflow analysis (K) and quantification (L) of T reg cells in the indicated tissues out of *usp38*<sup>fl/fl</sup> Cd4-Cre or *usp38*<sup>fl/fl</sup> mice. Data are representative of three (A–L) independent experiments. Statistical significance was determined by Student’s t test. Error bars indicate the mean ± SEM.

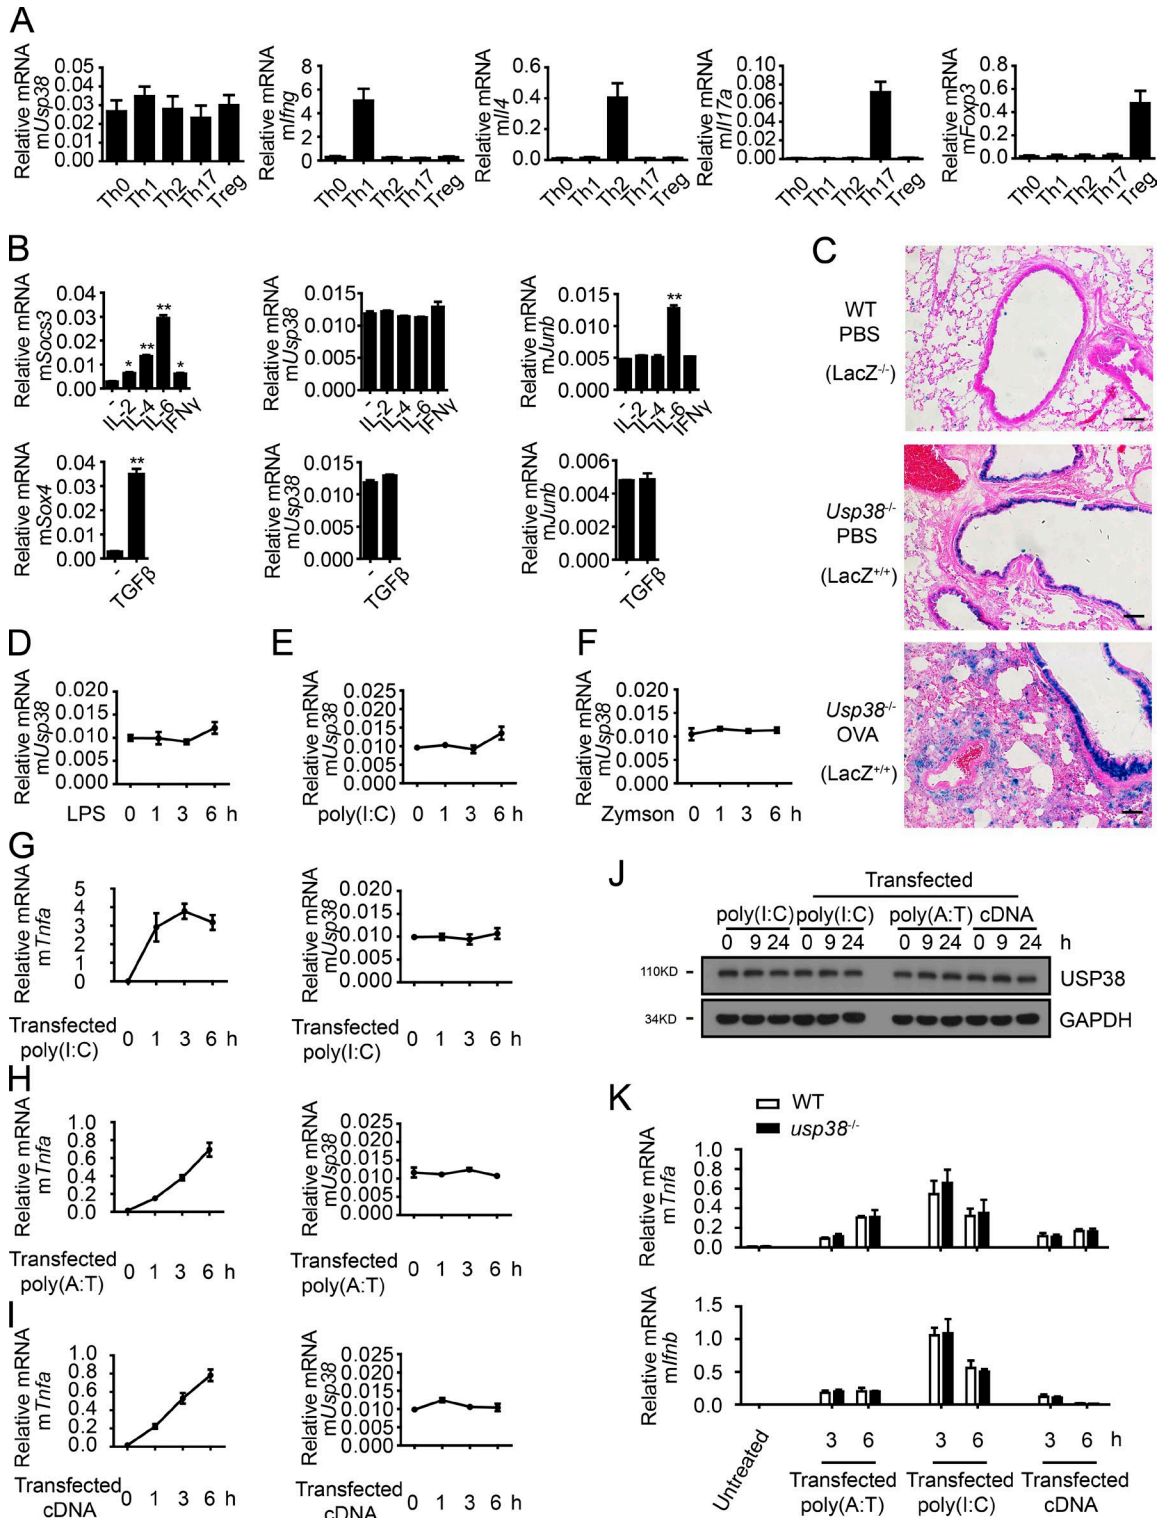

Figure S3. **Usp38 is not induced by subset-specific cytokines in T cells nor by innate sensor triggers in BMDMs.** (A) mRNA levels of the indicated genes assessed by qPCR in different CD4<sup>+</sup> T cell subpopulations. (B) mRNA levels of the indicated genes assessed by qPCR in CD4<sup>+</sup> T cells treated by IL-2, IL-4, IL-6, IFN- $\gamma$ , and TGF- $\beta$  for 6 h. (C)  $\beta$ -Gal staining of lung tissues out of PBS-treated WT mice (without LacZ) and PBS or OVA-treated *usp38*<sup>-/-</sup> mice (with LacZ). (D-F) mRNA level of *usp38* assessed by qPCR in WT BMDMs that were stimulated with 100 ng/ml LPS (D), 10  $\mu$ g/ml poly(I:C) (E), and 10  $\mu$ g/ml zymson (F) for the indicated time points. (G-I) mRNA levels of *Tnfa* and *usp38* assessed by qPCR in WT BMDMs that were transfected with 2  $\mu$ g/ml poly(I:C) (G), 2  $\mu$ g/ml poly(A:T) (H), and 10  $\mu$ g/ml carrier DNA (I) for the indicated time points. (J) Immunoblotting of cell lysates from WT BMDMs that were stimulated with 10  $\mu$ g/ml poly(I:C), transfected 2  $\mu$ g/ml poly(I:C), 2  $\mu$ g/ml poly(A:T), or 10  $\mu$ g/ml carrier DNA for the indicated time points. (K) mRNA levels of *Tnfa* and *Ifnb* assessed by qPCR in *usp38*<sup>-/-</sup> or WT BMDMs that were treated as indicated. Data are repeated for three (A-I) or two (J and K) independent times. Statistical significance was determined by Student's *t* test; \*, *P* < 0.05; \*\*, *P* < 0.01. Error bars indicate the mean  $\pm$  SEM.

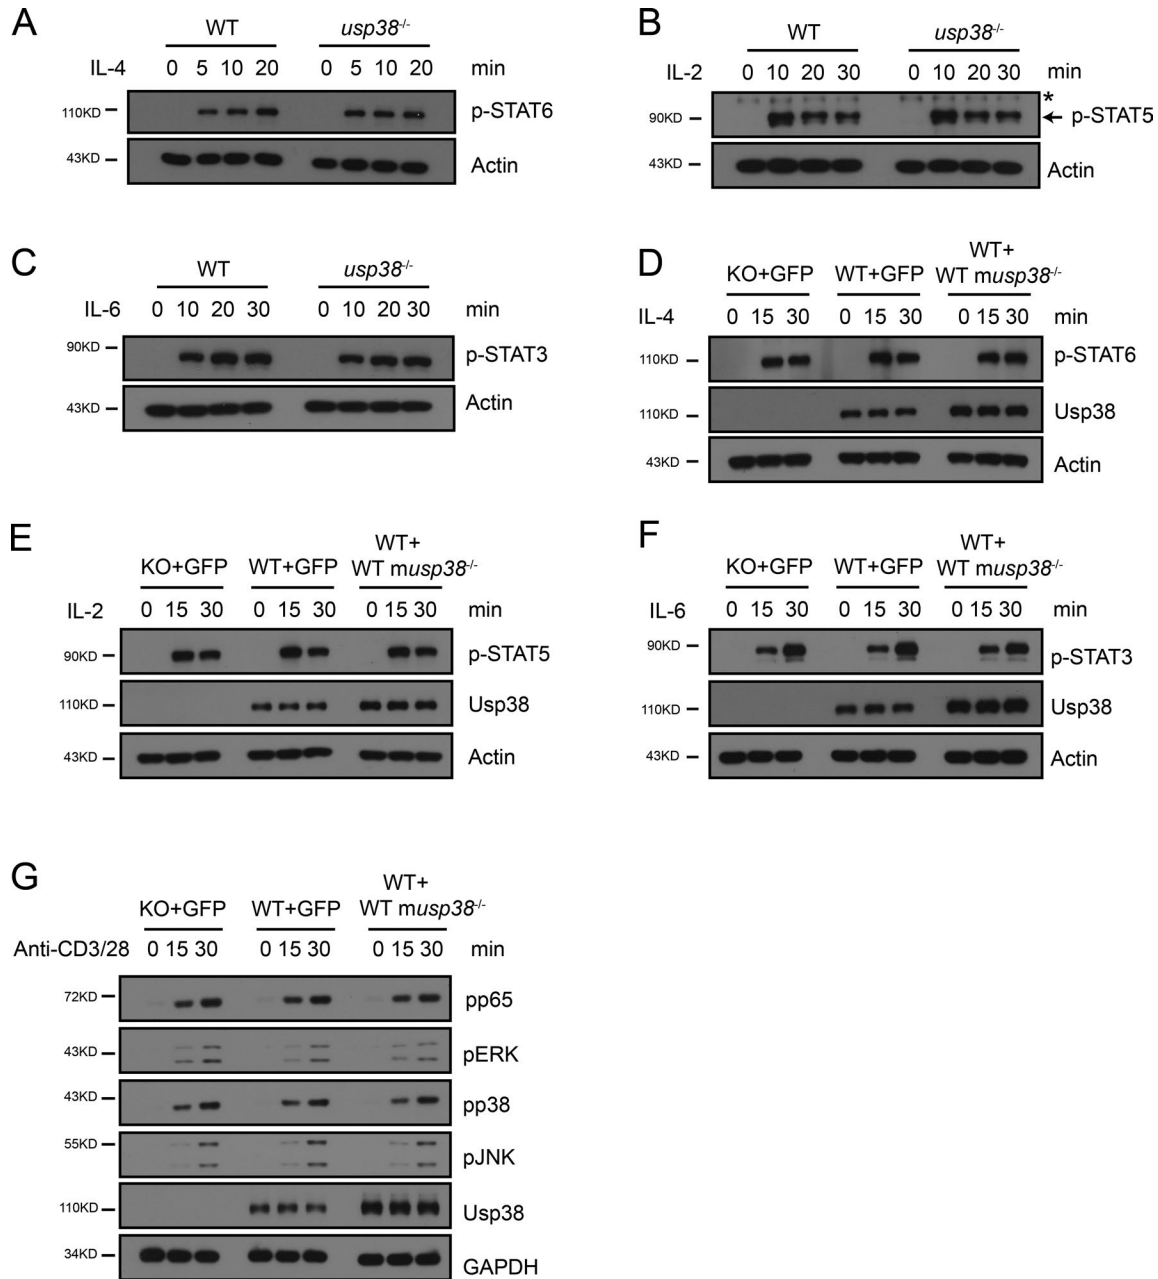

Figure S4. **USP38 does not affect the cytokines-induced signaling and TCR-induced activation of NF- $\kappa$ B and MAPKs.** (A–C) Immunoblotting of cell lysates of *usp38*<sup>-/-</sup> or WT CD4<sup>+</sup> T cells that were deprived of serum for 2 h and followed by stimulation with the indicated cytokines for the indicated time points. (D–F) Immunoblotting of cell lysates of *usp38*<sup>-/-</sup> or WT CD4<sup>+</sup> T cells that were infected with empty retrovirus (GFP) or retrovirus encoding WT *usp38*. The cells were then deprived of serum for 2 h and followed by stimulation with the indicated cytokines for the indicated time points. (G) Immunoblotting of cell lysates of *usp38*<sup>-/-</sup> or WT CD4<sup>+</sup> T cells that were infected with empty retrovirus (GFP) or retrovirus encoding WT *usp38* and then treated by anti-CD3/28 for the indicated times. \*, nonspecific band. Data are representative of three (A–C) independent and two (D–G) independent experiments.



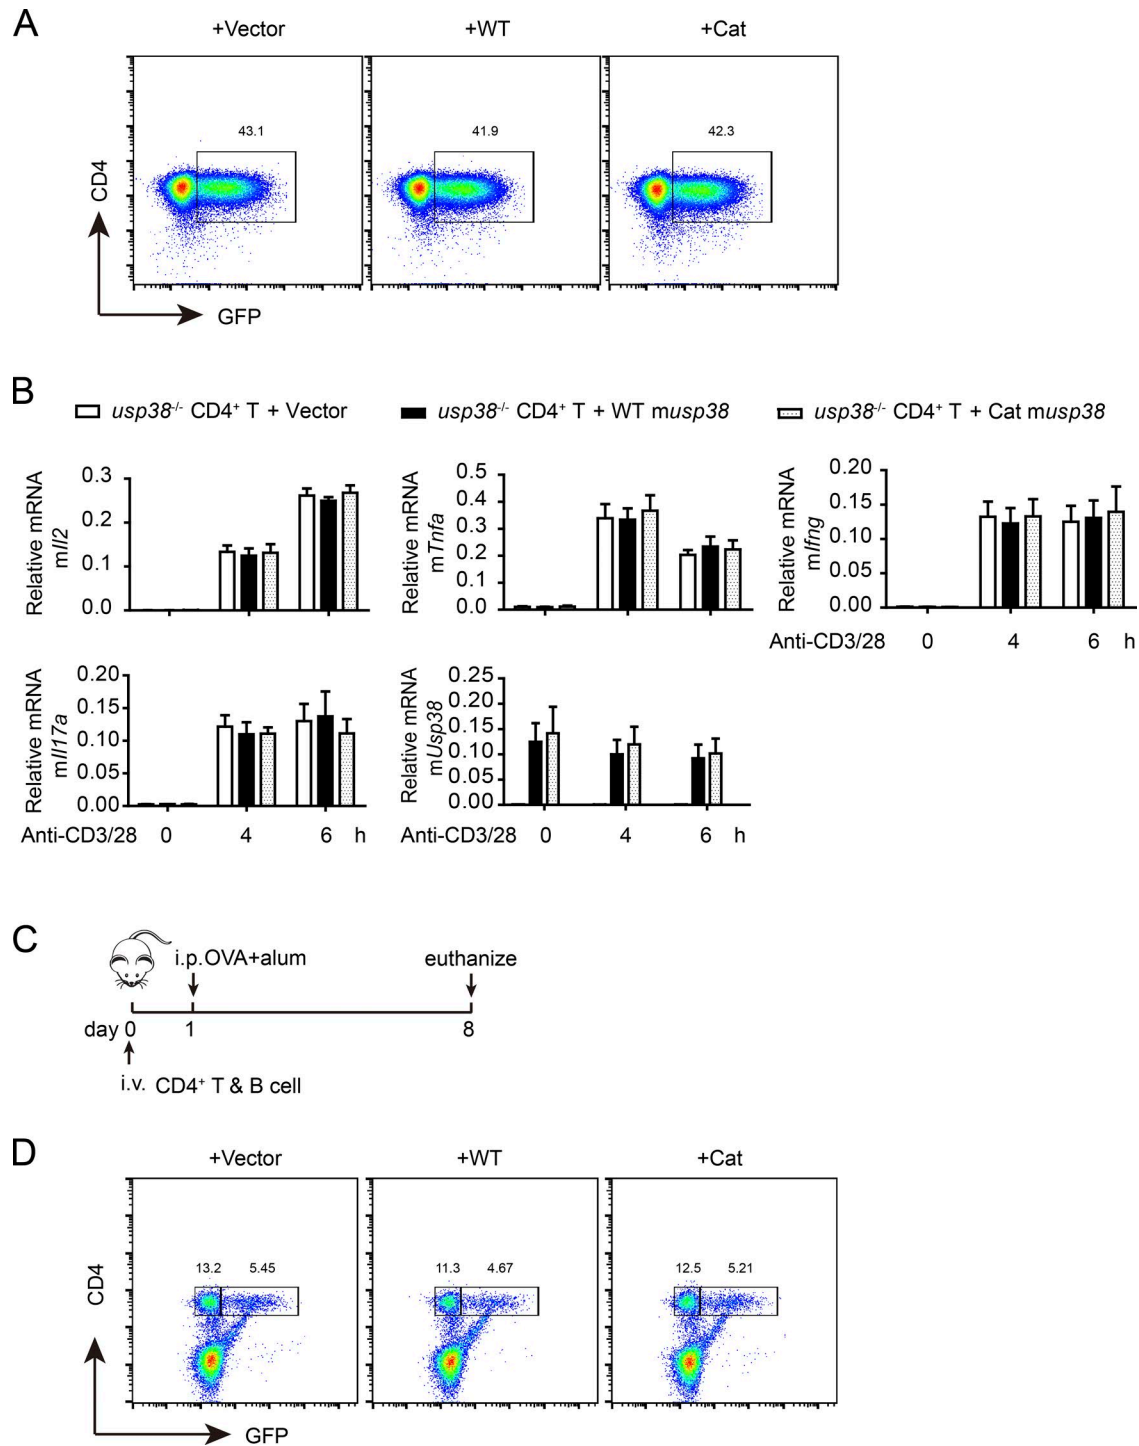

Figure S5. **The DUB activity of USP38 is essential for Th2 development.** (A–D) *Usp38*<sup>-/-</sup> CD4<sup>+</sup> T cells were restored with empty retrovirus (GFP) or retrovirus encoding WT mouse *usp38* and its DUB activity mutant (Cat). (A) The percentages of GFP-positive population determined by cytoflow for restoration efficiency by the viruses. (B) mRNA levels of *Il2*, *Tnfa*, *Ifng*, *Il17a*, and *usp38* determined by qPCR in the virus restored cells that were stimulated with anti-CD3 and anti-CD28 for the indicated time points. (C) A schematic diagram of adoptive transfer experiments. (D) Cytoflow analyses of splenocytes from *rag2*<sup>-/-</sup> recipient mice after adoptive cell transfer and OVA immunization. *Usp38*<sup>-/-</sup> CD4<sup>+</sup> T cells were infected with the empty virus or virus encoding *usp38* or its DUB mutant. The infected cells together with WT B cells were transferred into *rag2*<sup>-/-</sup> mice and the next day the mice were immunized with OVA in alum for 7 d. Data are repeated for three (A and B) or two (C and D) independent times. Statistical significance was determined by Student's *t* test. Error bars indicate the mean ± SEM.
